# Supplementary material
Source: Research Square preprint supplement (doi:10.21203/rs.3.rs-9833270/v1)
Supplement: Supplementary file 1 [file bf9d238190e2d7288516ffed.docx]

**7. RESEARCH INSTRUMENTS: QUESTIONNAIRES AND INTERVIEW QUESTIONS**

**APPINDEX A: SPEAKING ANXIETY QUESTIONNAIRE (8 Items)**

**Instructions:** Please indicate your level of agreement with each statement by circling the appropriate number (1=Strongly Disagree, 2=Disagree, 3=Neutral, 4=Agree, 5=Strongly Agree).

| Item | Statement | 1 | 2 | 3 | 4 | 5 |
| --- | --- | --- | --- | --- | --- | --- |
| SA1 | My heart pounds when I know I will be called on to speak English. | ☐ | ☐ | ☐ | ☐ | ☐ |
| SA2 | I tremble or sweat when I am asked to speak English in front of others. | ☐ | ☐ | ☐ | ☐ | ☐ |
| SA3 | I feel physically tense when preparing to speak English. | ☐ | ☐ | ☐ | ☐ | ☐ |
| SA4 | I feel less confident speaking English than my classmates. | ☐ | ☐ | ☐ | ☐ | ☐ |
| SA5 | I worry that others speak English better than I do. | ☐ | ☐ | ☐ | ☐ | ☐ |
| SA6 | I am afraid that my English speaking ability is not good enough. | ☐ | ☐ | ☐ | ☐ | ☐ |
| SA7 | I feel tense and nervous when speaking English. | ☐ | ☐ | ☐ | ☐ | ☐ |
| SA8 | I get nervous when I don't understand every word the teacher says in English. | ☐ | ☐ | ☐ | ☐ | ☐ |

**APPINDEX B: SPEAKING MOTIVATION QUESTIONNAIRE (10 Items)**

**Instructions:** Please indicate your level of agreement with each statement (1=Strongly Disagree, 2=Disagree, 3=Neutral, 4=Agree, 5=Strongly Agree).

| Item | Statement | 1 | 2 | 3 | 4 | 5 |
| --- | --- | --- | --- | --- | --- | --- |
| SM1 | I speak English because I find it personally enjoyable. | ☐ | ☐ | ☐ | ☐ | ☐ |
| SM2 | I feel happy when I can express my ideas in English. | ☐ | ☐ | ☐ | ☐ | ☐ |
| SM3 | I like the challenge of learning to speak better English. | ☐ | ☐ | ☐ | ☐ | ☐ |
| SM4 | Speaking English gives me a sense of accomplishment. | ☐ | ☐ | ☐ | ☐ | ☐ |
| SM5 | Speaking English is important for my future goals (career, studies). | ☐ | ☐ | ☐ | ☐ | ☐ |
| SM6 | Learning to speak English well will benefit my life. | ☐ | ☐ | ☐ | ☐ | ☐ |
| SM7 | I value the opportunity to improve my English speaking skills. | ☐ | ☐ | ☐ | ☐ | ☐ |
| SM8 | I speak English because I want good grades. | ☐ | ☐ | ☐ | ☐ | ☐ |
| SM9 | I practice speaking English to avoid getting poor marks. | ☐ | ☐ | ☐ | ☐ | ☐ |
| SM10 | I am willing to speak English in class even if I might make mistakes. | ☐ | ☐ | ☐ | ☐ | ☐ |

**APPINDEX C: SPEAKING COMPETENCE SELF-ASSESSMENT (12 Items)**

**Instructions:** Please rate your current English speaking ability (1=Very Poor/Never, 2=Poor/Rarely, 3=Average/Sometimes, 4=Good/Often, 5=Excellent/Always).

| Item | Statement | 1 | 2 | 3 | 4 | 5 |
| --- | --- | --- | --- | --- | --- | --- |
| SC1 | I can pronounce English words clearly and correctly. | ☐ | ☐ | ☐ | ☐ | ☐ |
| SC2 | I can use correct stress and intonation when speaking English. | ☐ | ☐ | ☐ | ☐ | ☐ |
| SC3 | I can speak English smoothly without long pauses. | ☐ | ☐ | ☐ | ☐ | ☐ |
| SC4 | I can keep a conversation going in English without getting stuck. | ☐ | ☐ | ☐ | ☐ | ☐ |
| SC5 | I have enough vocabulary to express my ideas when speaking English. | ☐ | ☐ | ☐ | ☐ | ☐ |
| SC6 | I can use different words to express the same idea in English. | ☐ | ☐ | ☐ | ☐ | ☐ |
| SC7 | I can use correct grammar when speaking English. | ☐ | ☐ | ☐ | ☐ | ☐ |
| SC8 | I can use different sentence structures when speaking English. | ☐ | ☐ | ☐ | ☐ | ☐ |
| SC9 | I can organise my ideas logically when speaking English. | ☐ | ☐ | ☐ | ☐ | ☐ |
| SC10 | I can connect my sentences smoothly using linking words. | ☐ | ☐ | ☐ | ☐ | ☐ |
| SC11 | I can find another way to say something when I don't know a word. | ☐ | ☐ | ☐ | ☐ | ☐ |
| SC12 | I can ask for clarification when I don't understand during conversation. | ☐ | ☐ | ☐ | ☐ | ☐ |

**APPINDEX D: AI TOOL EXPERIENCE QUESTIONNAIRE (6 Items)**

**Instructions:** Please indicate your level of agreement based on your experience using AI-assisted speaking tools (1=Strongly Disagree, 2=Disagree, 3=Neutral, 4=Agree, 5=Strongly Agree).

| Item | Statement | 1 | 2 | 3 | 4 | 5 |
| --- | --- | --- | --- | --- | --- | --- |
| AI1 | The AI tools helped me feel less nervous when speaking English. | ☐ | ☐ | ☐ | ☐ | ☐ |
| AI2 | The AI tools made speaking practice more enjoyable and motivating. | ☐ | ☐ | ☐ | ☐ | ☐ |
| AI3 | The AI tools provided useful feedback that improved my speaking skills. | ☐ | ☐ | ☐ | ☐ | ☐ |
| AI4 | I would continue using AI tools to practice speaking English. | ☐ | ☐ | ☐ | ☐ | ☐ |
| AI5 | I felt comfortable making mistakes when practising with AI tools. | ☐ | ☐ | ☐ | ☐ | ☐ |
| AI6 | The AI tools adapted to my speaking level appropriately. | ☐ | ☐ | ☐ | ☐ | ☐ |

**APPINDEX E: DEMOGRAPHIC INFORMATION**

| Item | Response |
| --- | --- |
| 1. Age | ______ years |
| 2. Gender | ☐ Male ☐ Female ☐ Prefer not to say |
| 3. Years of English study | ______ years |
| 4. Have you used AI language learning tools before? | ☐ Yes ☐ No |
| 5. If yes, which tools? | _________________ |
| 6. How many hours per week do you typically practice speaking English? | ______ hours |

**APPINDEX F: SEMI-STRUCTURED INTERVIEW PROTOCOL (6 Questions)**

**Interviewer Instructions:** Conduct interview in quiet, private setting. Build rapport first. Allow participants to answer freely without interruption. Use probes to elicit detailed responses. Audio-record with permission. Duration: 30-45 minutes.

**Question 1 (RQ1 - Speaking Anxiety):**

*"How has using AI-assisted speaking tools affected your nervousness or confidence when speaking English?"*

**Probes:**

- Can you describe a specific situation where you felt less nervous?
- What exactly about the AI made you feel more/less comfortable?
- Has this confidence transferred to real classroom speaking?
- Were there times when AI made you more anxious?

**Question 2 (RQ2 - Speaking Motivation):**

*"What aspects of using AI tools do you find most motivating for speaking practice and why?"*

**Probes:**

- What keeps you coming back to practise with AI?
- Is it the rewards (badges, points), the feedback, the challenge, or something else?
- Has your motivation changed over time?
- How does AI motivation compare to traditional class motivation?

**Question 3 (RQ3 - Speaking Competence):**

*"In what ways have AI tools helped or hindered your English speaking skills?"*

**Probes:**

- Can you give an example of a specific skill that improved (pronunciation, fluency, vocabulary, grammar)?
- Was there anything frustrating or unhelpful about AI feedback?
- How do you use AI feedback to improve?

**Question 4 (Integrated Experience - RQ1, RQ2, RQ3):**

*"How does practising speaking with AI compare to practising with human partners (classmates, teachers)?"*

**Probes:**

- What does AI do better than human partners?
- What do human partners do better than AI?
- Would you prefer to practice with AI or humans? Why?
- How do you combine AI and human practice?

**Question 5 (Challenges and Recommendations - RQ1, RQ2, RQ3):**

*"What challenges or limitations have you experienced with AI speaking tools, and what improvements would you suggest?"*

**Probes:**

- Did you experience technical problems?
- Did the AI ever give wrong or unhelpful feedback?
- What would make AI tools more effective for you?
- Would you recommend AI tools to other students? Why or why not?

**Question 6 (Future Use - RQ2, RQ3):**

*"After this 10-week experience, do you plan to continue using AI tools for speaking practice? Why or why not?"*

**Probes:**

- What would encourage you to continue?
- What might prevent you from continuing?
- How would you describe AI speaking tools to a friend?

**Interview Closing Script:**

*"Thank you very much for sharing your experiences and thoughts with me today. Your responses will help us understand how AI tools can better support English speaking development. Do you have any questions for me before we finish? Your participation is greatly appreciated."*

**APPINDEX G: SCORING GUIDES**

**Speaking Anxiety Scale (SAS)**

- Total Score Range: 8 to 40
- Interpretation: 8-16 (Low), 17-24 (Moderate), 25-32 (High), 33-40 (Very High)

**Speaking Motivation Scale (SMS)**

- Total Score Range: 10 to 50
- Intrinsic motivation (SM1-SM4): 4-20
- Identified regulation (SM5-SM7): 3-15
- External regulation (SM8-SM9): 2-10
- WTC (SM10): 1-5

**Speaking Competence Self-Assessment (SCS)**

- Total Score Range: 12 to 60
- Each subscale (2 items): 2-10

**AI Tool Experience Scale (AI)**

- Total Score Range: 6 to 30
- Higher scores indicate more positive AI tool experience

**APPINDEX H: VALIDATION NOTES FOR RESEARCHERS**

| Criterion | Implementation |
| --- | --- |
| Face Validity | Reviewed by 3 EFL teaching experts |
| Content Validity | Items aligned with research questions and theoretical frameworks (Horwitz et al., 1986; Ryan & Deci, 2017; Levelt, 1989) |
| Language Appropriateness | Items written in simple English appropriate for intermediate EFL learners; Mandarin translation available |
| Response Format | 5-point Likert scale provides sufficient variance while remaining easy to understand |
| Administration Time | Approximately 15-20 minutes for all questionnaires combined |

**LIST OF TABLES**

**Tables in the Revised Manuscript**

| Table Number | Title | Location |
| --- | --- | --- |
| Table 1 | Descriptive and Inferential Statistics for Speaking Anxiety | Section 4.1.1 |
| Table 2 | Descriptive and Inferential Statistics for Speaking Motivation | Section 4.2.1 |
| Table 3 | Descriptive and Inferential Statistics for Speaking Competence | Section 4.3.1 |

**Supplementary Tables (Referenced in Text)**

| Table Number | Title | Location |
| --- | --- | --- |
| Table C1 | Sub-component Analysis for Speaking Anxiety (EG only) | Appendix C |
| Table C2 | Sub-component Analysis for Speaking Motivation (EG only) | Appendix C |
| Table C3 | Sub-component Analysis for Speaking Competence (EG vs. CG) | Appendix C |
| Table 4 | Moderator Analysis: Pre-Anxiety × Group Interaction | Section 4.4 |
| Table 5 | Moderator Analysis: Technological Experience × Group Interaction | Section 4.4 |
| Table 6 | Proficiency Level Interpretation (Score/30) | Section 4.3.1 |
| Table 7 | Comparison of Effect Sizes: Anxiety, Motivation, Competence | Section 4.3.1 |
| Table 8 | Summary of Qualitative Themes with Participant Percentages | Section 4.1.2, 4.2.2, 4.3.2 |

**Summary Table of Qualitative Findings**

| Research Question | Theme | Percentage | Key Quote |
| --- | --- | --- | --- |
| RQ1: Anxiety | Non-judgmental practice environment | 85% | "The AI just calmly corrects me... nobody judges" |
|  | Mastery through unlimited repetition | 78% | "I can repeat a sentence twenty times" |
|  | Visible progress tracking | 70% | "Seeing the line slowly climb made me feel I was improving" |
| RQ2: Motivation | Gamification and reward systems | 88% | "It became like a game... I wanted to beat my previous scores" |
|  | Personalised and adaptive challenge | 82% | "The AI keeps me in the 'optimal challenge zone'" |
|  | Immediate, encouraging feedback | 75% | "The AI says 'Good try!'... never makes me feel stupid" |
| RQ3: Competence | Immediate, specific corrective feedback | 90% | "The AI highlights the exact sound I'm mispronouncing" |
|  | Extended practice opportunities | 85% | "20 minutes every day... over 20 hours of additional practice" |
|  | Vocabulary and expression expansion | 78% | "The AI uses phrases that would never appear in our textbook" |

**Summary Table of Effect Sizes (Cohen's d)**

| Outcome Variable | EG Within-Group | CG Within-Group | Between-Groups (η²) |
| --- | --- | --- | --- |
| Speaking Anxiety | d = 1.24 (large) | d = 0.23 (small) | η² = 0.23 (large) |
| Speaking Motivation | d = 1.46 (large) | d = 0.30 (small) | η² = 0.31 (large) |
| Speaking Competence | d = 1.65 (very large) | d = 0.35 (small) | η² = 0.35 (large) |

**Summary Table of Sub-Component Gains (EG Only)**

| Sub-component | Pre-test M | Post-test M | Cohen's d | Interpretation |
| --- | --- | --- | --- | --- |
| Pronunciation | 3.12/6 | 5.45/6 | 1.78 | Very large gain |
| Fluency | 3.05/6 | 5.12/6 | 1.45 | Very large gain |
| Grammar | 3.45/6 | 4.89/6 | 1.02 | Large gain |
| Vocabulary | 3.28/6 | 4.67/6 | 0.98 | Large gain |
| Coherence | 3.52/6 | 4.54/6 | 0.85 | Large gain |

**Summary Table of Moderator Analyses**

| Moderator | Outcome | Interaction F | p-value | η² | Finding |
| --- | --- | --- | --- | --- | --- |
| Pre-anxiety (high vs. low) | Speaking Anxiety | F(1,76)=6.78 | 0.011 | 0.08 | High-anxiety learners showed larger reductions (d=1.45 vs. 0.98) |
| Pre-anxiety (high vs. low) | Speaking Competence | F(1,76)=3.45 | 0.067 | 0.04 | Marginal trend for larger gains in high-anxiety learners |
| Tech experience (yes vs. no) | Speaking Competence | F(1,76)=5.67 | 0.020 | 0.07 | Tech-savvy learners showed larger gains (d=1.78 vs. 1.12) |

**Questionnaire Structure Summary**

| Part | Title | Number of Items | Scale |
| --- | --- | --- | --- |
| A | Speaking Anxiety Scale (SAS) | 8 items | 5-point Likert |
| B | Speaking Motivation Scale (SMS) | 10 items | 5-point Likert |
| C | Speaking Competence Self-Assessment (SCS) | 12 items | 5-point Likert |
| D | AI Tool Experience Questionnaire | 6 items | 5-point Likert |
| E | Demographic Information | 6 items | Open-ended/Multiple choice |
| Interview | Semi-structured Interview Protocol | 6 questions | Open-ended with probes |
